# Supplementary material for: Inactivation of RASA1 promotes melanoma tumorigenesis via R-Ras activation
Source: PubMed Central journal article supplement (PMC5029671; doi:10.18632/oncotarget.8127), 2016-03-16
Supplement: oncotarget-07-23885-s001.pdf [file oncotarget-07-23885-s001.pdf]

## Inactivation of RASA1 promotes melanoma tumorigenesis via R-Ras activation

### Supplementary Materials

#### Proximity analysis

Clustered mutations within specific protein regions across multiple individuals were identified as described in (21) by querying 1) the number of mutations on the same transcript within the proximity limit (10 amino acids) and 2) the distance between the closest mutations. The resulting mutational clusters were sorted and annotated to identify recurrent mutations in genes with particular relevance to metastatic melanoma.

#### Protein analysis

Cells or homogenized tissues were lysed in RIPA buffer containing protease inhibitors (Roche) and phosphatase inhibitors (Calbiochem). Proteins were fractionated on 10% SDS-polyacrylamide gel or 4–12% Novex Bis-Tris gel (Invitrogen) electrophoresis and then transferred to PVDF membrane (EMD Millipore).

#### DNA constructs, viral vectors, shRNAs, and siRNAs

The human *RASA1* complementary DNA (cDNA) was purchased from Open Biosystems (BC033015, clone ID# 4829173) and *RASA1* Y472H and L481F mutation were introduced with QuickChange XL Site-Directed Mutagenesis Kit (Stratagene) according to the manufacturer's instructions. Coding regions of each wild type and mutants were cloned into the pQXP-puro- (a gift of Dr. Scott and Dr. Chin) via Gateway cloning system (Invitrogen). pCMV6-XL4-*RASA1* was purchased from OriGene. The lentiviral shRNAs in pLKO.1 vector, shRASA1b (5'-CCTGACATCAATAGATTGAA-3'),

shRASA1c (5'-CCCTACATGGAAGGTGTCAAT-3') were from Open Biosystems. All constructs were sequence verified. The siRNAs targeting *RASA1* (SASI-Hs01-00220764 (#764), -00220766 (#766), -00220768 (#768)) were from Sigma-Aldrich, BLOCK-iT (si-Ctrl) from Invitrogen, siR-Ras (A: 5'-CTCGGCCAAACTGCGTCTCAA-3'; B: 5'-CCGGAAATACCAGGAACAAGA-3') and AllStars negative control (siCtrl) from Qiagen. siRNA targeting Ral-A (ON-TARGET plus Human RALA(5895) siRNA-SMART pool) was obtained from Dharmacon. Recombinant adenovirus encoding *RASA1* or GFP was purchased from Vector Biolabs.

#### Retrospective melanoma cohort study

Genetic, genomic, clinical, and expression data for archived metastatic melanoma samples were obtained from the Total Cancer Care (TCC) database. TCC analyzed metastatic melanomas from patients treated at the Moffitt Cancer Center for mRNA expression on Affymetrix HuRSTA-2a520709 GeneChips (Affymetrix, Santa Clara, CA) under Liberty IRB#12.11.0023. TCC also performed targeted exome sequencing for 1,403 genes. Age of onset, gender, location of tumor, histological features, and overall survival as well as mutation status and expression level of *RASA1* and *BRAF* mutation status were obtained. Since two probe sets targeted the overlapping regions in exon 24 of *RASA1* and showed highly significant positive correlation ( $r = 0.964$ , Supplementary Figure S2A), average intensity of the two *RASA1* probe sets was utilized. Overall survival was determined as the length of time (months) from the date of diagnosis for that primary tumor until death or last follow up.

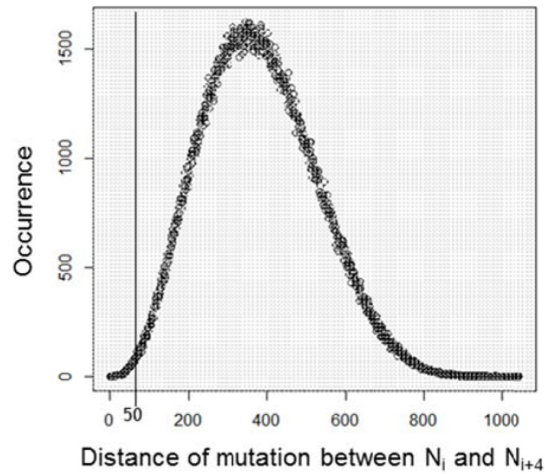

**Supplementary Figure S1: Significant clustering of known *RASA1* mutations in melanoma.** Probability of observing any 5 mutations within a window of 50 amino acids in any location (P) is 0.000965 if 10 mutations are randomly distributed on a protein of 1047 amino acids length. (method) Among 1 to 1047, 10 numbers were randomly selected allowing repeat. These numbers were sorted from smallest to biggest and then distance between  $N_i$  and  $N_{i+4}$  were calculated. Following 10,000 repeats, the data was plotted to show occurrence for each distance between  $N_i$  and  $N_{i+4}$  mutations. Probability was calculated by dividing total number of occurrences that 5 mutations were localized within 50 amino acids window with the total number of any observed occurrences.

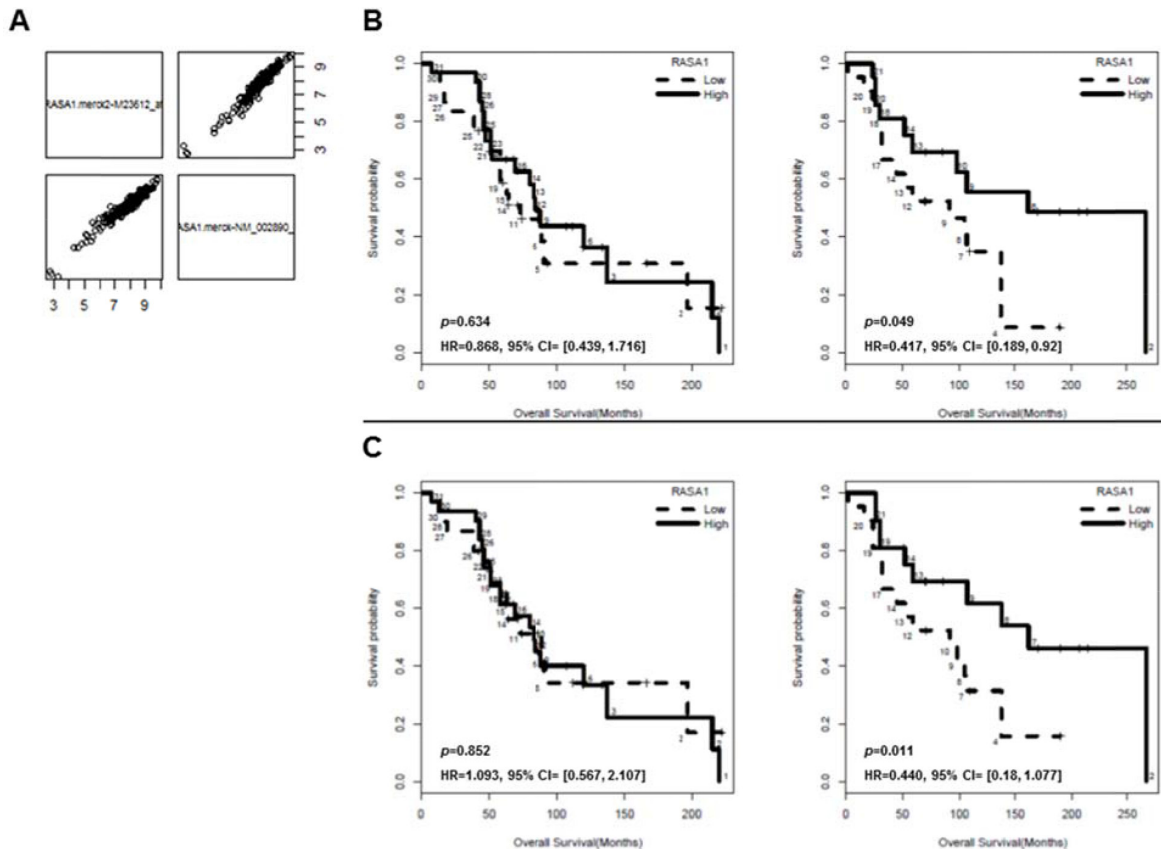

**Supplementary Figure S2: Association of *RASA1* mRNA level with overall survival of melanoma patients.** (A) Correlation of merck2-M23612\_at and merck-NM\_002890\_at probe sets for *RASA1* mRNA level in each sample ( $r = 0.964$ ). (B and C) Kaplan-Meier overall survival curves for *BRAF* wild type (left) and mutant (right) groups for the probe set merck2-M23612\_at (B) and merck-NM\_002890\_at (C). Samples were classified based on *RASA1* mRNA level as high (above median) and low (below median).

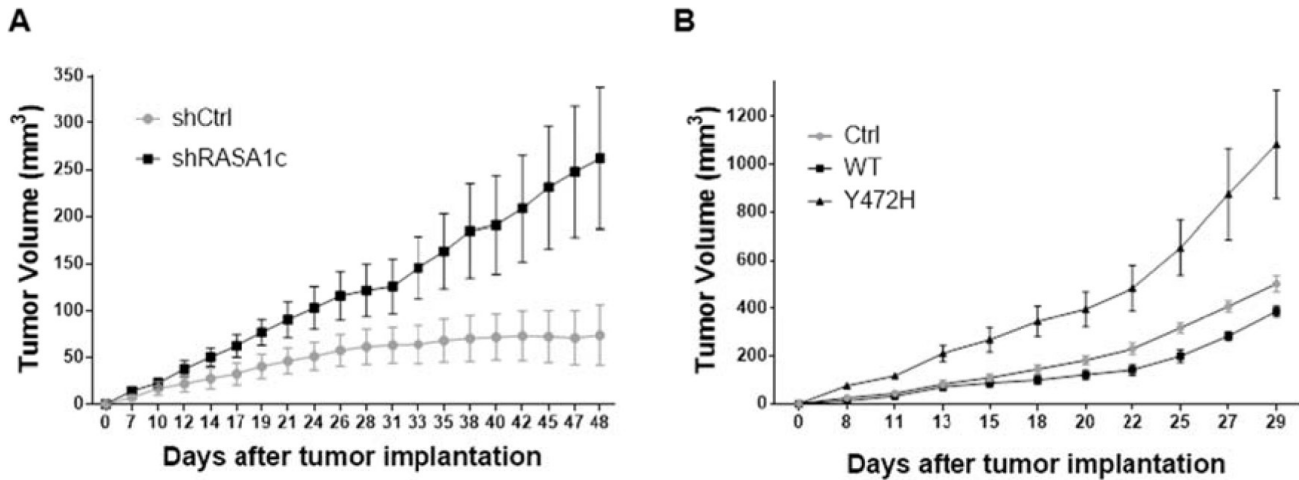

**Supplementary Figure S3: RASA1 inhibits growth of IGR1 and WM983C subcutaneous tumors.** Mean volume of the subcutaneous tumors with SEM is shown over time post injection. (A) shows data from IGR1 cells with shRASA1c or vector control (shCtrl) ( $n = 8$  each) and (B) is for WM983C (BRAF<sup>V600E</sup>) cells with vector control (Ctrl), wild type (WT), or Y472H mutant RASA1 ( $n = 7$  each). Tumor size was measured every other day with calipers, and tumor volumes were calculated using the formula [Tumor volume (mm<sup>3</sup>) = (width)<sup>2</sup> × (length) / 2]. Repeated ANOVA approach was used to test the time (within-subject factor) and the interaction between group and time (between-subject factor) on tumor volume. The  $p$ -value for the time and interaction is 0.002 and 0.047, respectively. When Tukey method to control Type I error inflation was applied to adjust for the multiple comparison, the difference between shCtrl and shRASA1c groups become statistically significant from day 42 ( $p = 0.048$ ), day 45 ( $p = 0.042$ ), day 47 ( $p = 0.035$ ) and up to day 48 ( $p = 0.038$ ). Tumor volumes were log transformed for the statistical analysis. When Tukey-Kramer method was applied, difference between control (Ctrl) and Y472H group is significant from day 8 (adjusted  $p < 0.001$ ). Difference of tumor volume between control (Ctrl) and wild type (WT) group is marginally significant on day 15 (adjusted  $p = 0.055$ ).

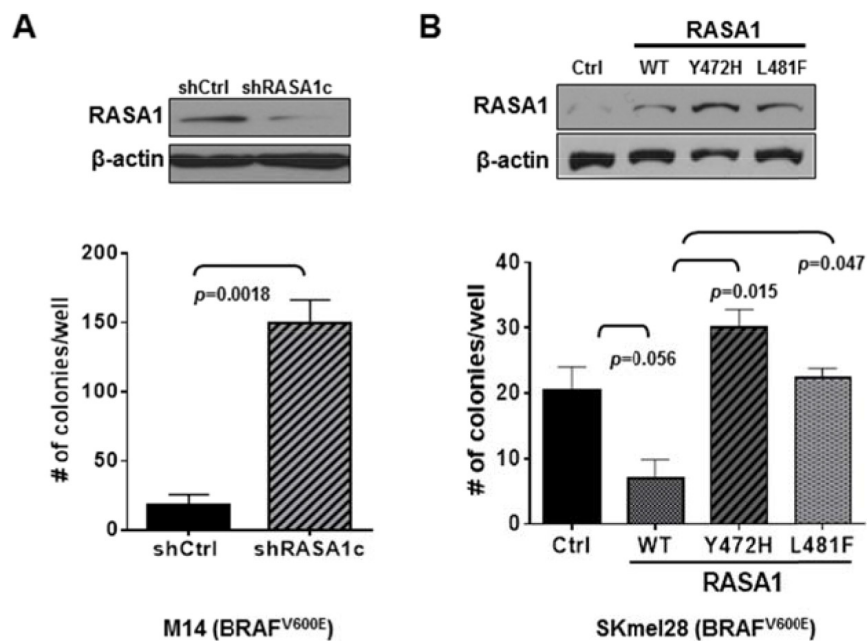

**Supplementary Figure S4: RASA1 suppresses anchorage-independent growth *in vitro*.** Reduced RASA1 expression by shRASA1c in M14 promotes anchorage-independent colony formation compared to control cell with vector control (shCtrl) (A). Conversely, expression of RASA1 wild type (WT), but not Y472H and L481F mutants, suppresses colony growth on soft agar *in vitro* in SKmel28 (BRAF<sup>V600E</sup>) (B) cells when transduced with retroviruses generated with pQCXP viral vector (B). Graph shows the mean number of colonies grown on soft agar on day 17 (A) or day 21 (B) per well with SD.

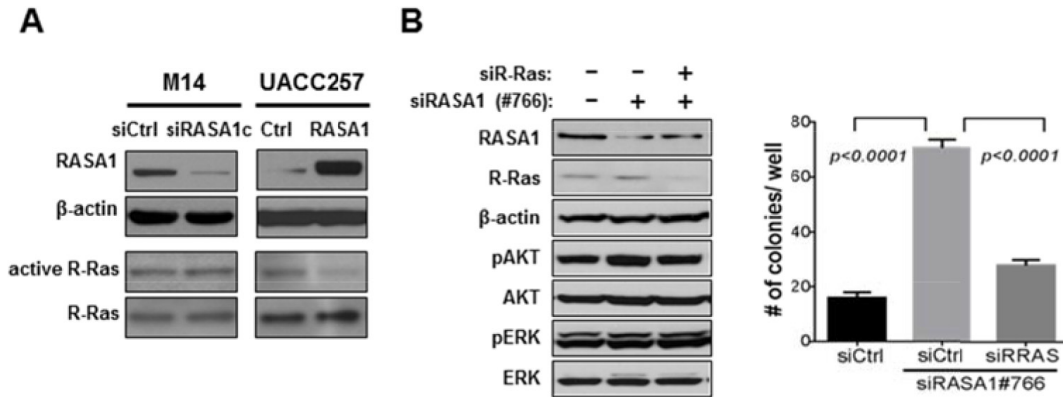

**Supplementary Figure S5: RASA1 knockdown promotes R-Ras activation, which regulates growth in soft agar.** The effect of RASA1 modulation on R-Ras activation is addressed in M14 and UACC257 cells (A). Levels of RASA1,  $\beta$ -actin, and R-Ras were addressed by immunoblotting with indicated antibodies. Activities of R-Ras were analyzed by pulling-down GTP-bound active R-Ras. (B) Reduced RASA1 expression with #766 siRNA increased soft agar colony formation, which was reversed by reduced R-Ras expression with *RRAS* siRNA in IGR1 cells. Number of soft-agar colonies per well on day 14 counted under the microscope are shown as mean  $\pm$  SD.

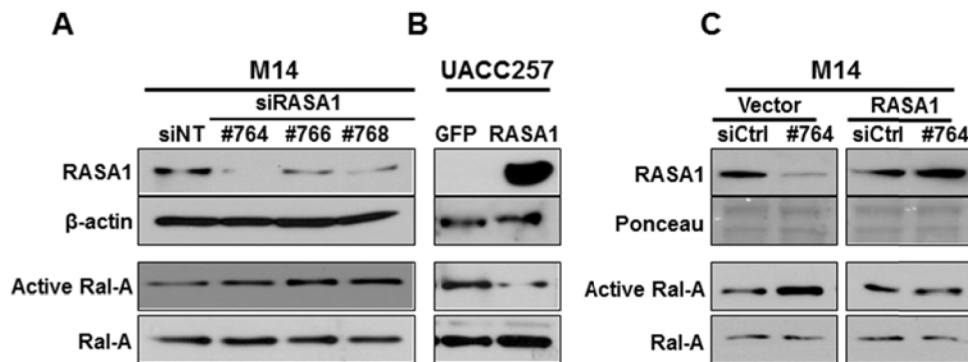

**Supplementary Figure S6: RASA1 regulates R-Ras activation in M14 and UACC257 cells.** The effect of RASA1 modulation on major effectors of Ras signaling is addressed in M14 and UACC257 cells. Transfection of siRNAs (#764, 766, or 768) targeting RASA1 in M14 cells (A and C) reduced RASA1 expression and increased GTP-bound active Ral-A compared to control cells with siNT. RASA1 overexpression by transduction with recombinant adenovirus encoding RASA1 suppressed Ral-A activation in UACC257 cells compared to control transduced with adenovirus encoding GFP (B). Co-transfection of pCMV-XL4-RASA1 with #764 siRNA rescued RASA1 expression and suppressed Ral-A activation (C).

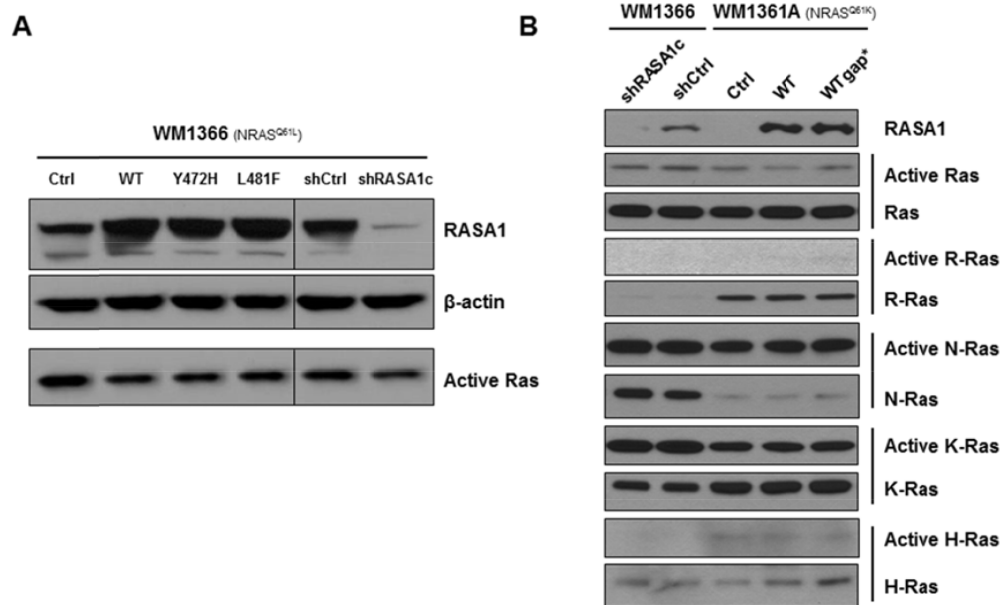

**Supplementary Figure S7: Effect of RASA1 on Ras activity in *NRAS* mutant melanoma cell lines.** Active GTP-bound Ras in human melanoma cell lines with activating *NRAS* mutations, WM1366 (NRAS<sup>Q61L</sup>) and WM1361A (NRAS<sup>Q61K</sup>) with RASA1 over-expression or knock-down, is probed with isoform specific antibodies against H-, K-, N-, and R-Ras or with pan-Ras antibody.

**Supplementary Table S1: List of proximal mutations**

| Mutations Within Proximity | Nearest Mutation | Gene            | Transcript      | Affected Amino Acid (s) | Chr | Start     | Stop      | Ref Allele | Var Allele | Sample          |
|----------------------------|------------------|-----------------|-----------------|-------------------------|-----|-----------|-----------|------------|------------|-----------------|
| 9                          | 0                | BRAF            | NM_004333.4     | 600                     | 7   | 140099605 | 140099605 | A          | T          | H_LX-WU_MEL_521 |
| 9                          | 0                | BRAF            | NM_004333.4     | 600                     | 7   | 140099606 | 140099606 | C          | T          | H_LX-80         |
| 9                          | 0                | BRAF            | NM_004333.4     | 600                     | 7   | 140099605 | 140099605 | A          | T          | H_LX-80         |
| 9                          | 0                | BRAF            | NM_004333.4     | 600                     | 7   | 140099605 | 140099605 | A          | T          | H_LX-174        |
| 9                          | 0                | BRAF            | NM_004333.4     | 600                     | 7   | 140099606 | 140099606 | C          | T          | H_LX-WU_MEL_521 |
| 9                          | 0                | BRAF            | NM_004333.4     | 600                     | 7   | 140099605 | 140099605 | A          | T          | H_LX-123        |
| 9                          | 0                | BRAF            | NM_004333.4     | 600                     | 7   | 140099605 | 140099605 | A          | T          | H_LX-WU_Mel_218 |
| 9                          | 0                | BRAF            | NM_004333.4     | 600                     | 7   | 140099605 | 140099605 | A          | T          | H_LX-WU_MEL_522 |
| 9                          | 0                | BRAF            | NM_004333.4     | 600                     | 7   | 140099605 | 140099605 | A          | T          | H_LX-139        |
| 9                          | 0                | BRAF            | NM_004333.4     | 600                     | 7   | 140099605 | 140099605 | A          | T          | H_LX-WU_MEL_500 |
| 6                          | 0                | BRAF            | NM_004333       | 600                     | 7   | 140099605 | 140099605 | A          | T          | MEL2            |
| 6                          | 0                | BRAF            | NM_004333       | 600                     | 7   | 140099605 | 140099606 | AC         | TT         | MEL5            |
| 6                          | 0                | BRAF            | NM_004333       | 600                     | 7   | 140099605 | 140099605 | A          | T          | MEL13           |
| 6                          | 0                | BRAF            | NM_004333       | 600                     | 7   | 140099605 | 140099605 | A          | T          | MEL10           |
| 6                          | 0                | BRAF            | NM_004333       | 600                     | 7   | 140099605 | 140099605 | A          | T          | MEL12           |
| 6                          | 0                | BRAF            | NM_004333       | 600                     | 7   | 140099605 | 140099605 | A          | T          | MEL7            |
| 6                          | 0                | BRAF            | NM_004333       | 600                     | 7   | 140099605 | 140099605 | A          | T          | MEL3            |
| 6                          | 0                | MUC4            | ENST00000405167 | 2317                    | 3   | 196995895 | 196995895 | G          | C          | H_LX-167        |
| 6                          | 0                | MUC4            | ENST00000405167 | 2317                    | 3   | 196995895 | 196995895 | G          | C          | H_LX-172        |
| 6                          | 0                | MUC4            | ENST00000405167 | 2317                    | 3   | 196995895 | 196995895 | G          | C          | H_LX-80         |
| 5                          | 0                | MUC4            | ENST00000405167 | 2309                    | 3   | 196995920 | 196995920 | T          | C          | H_LX-123        |
| 5                          | 0                | MUC4            | ENST00000405167 | 2309                    | 3   | 196995920 | 196995920 | T          | C          | H_LX-WU_MEL_503 |
| 5                          | 0                | MUC4            | ENST00000405167 | 2309                    | 3   | 196995920 | 196995920 | T          | C          | H_LX-159        |
| 3                          | 0                | ENSG00000215548 | ENST00000358464 | 68                      | 20  | 28227957  | 28227958  | 0          | AGA        | H_LX-174        |
| 3                          | 0                | ENSG00000215548 | ENST00000358464 | 68                      | 20  | 28227957  | 28227958  | 0          | AGA        | H_LX-139        |
| 3                          | 0                | ENSG00000215548 | ENST00000358464 | 68                      | 20  | 28227957  | 28227958  | 0          | AGA        | H_LX-WU_MEL_503 |
| 3                          | 5                | ENSG00000215548 | ENST00000358464 | 63                      | 20  | 28227943  | 28227943  | T          | G          | H_LX-159        |
| 3                          | 3                | MUC4            | ENST00000405167 | 2320                    | 3   | 196995888 | 196995888 | G          | A          | H_LX-159        |
| 2                          | 0                | ENSG00000211726 | ENST00000390373 | 55                      | 7   | 141856587 | 141856587 | C          | T          | MEL6            |
| 2                          | 3                | ENSG00000211726 | ENST00000390373 | 52                      | 7   | 141856579 | 141856579 | A          | G          | MEL9            |
| 2                          | 0                | ENSG00000211726 | ENST00000390373 | 55                      | 7   | 141856587 | 141856587 | C          | T          | MEL5            |
| 2                          | 0                | HNF4G           | NM_004133       | 78                      | 8   | 76618744  | 76618744  | C          | T          | MEL6            |
| 2                          | 0                | HNF4G           | NM_004133       | 78                      | 8   | 76618744  | 76618744  | C          | T          | MEL5            |
| 2                          | 0                | HNF4G           | NM_004133       | 78                      | 8   | 76618744  | 76618744  | C          | T          | MEL9            |
| 2                          | 3                | LOC100134712    | XM_001714845    | 241                     | 7   | 10441870  | 10441870  | C          | T          | MEL12           |
| 2                          | 4                | LOC100134712    | XM_001714845    | 245                     | 7   | 10441858  | 10441858  | T          | C          | MEL9            |
| 2                          | 3                | LOC100134712    | XM_001714845    | 238                     | 7   | 10441878  | 10441878  | C          | A          | MEL7            |
| 2                          | 0                | NRAS            | NM_002524       | 61                      | 1   | 115058052 | 115058052 | T          | C          | MEL9            |
| 2                          | 0                | NRAS            | NM_002524       | 61                      | 1   | 115058053 | 115058053 | G          | T          | MEL8            |
| 2                          | 0                | NRAS            | NM_002524       | 61                      | 1   | 115058052 | 115058052 | T          | C          | MEL1            |
| 2                          | 2                | PDZD2           | NM_178140.2     | 24                      | 5   | 31835183  | 31835184  | 0          | G          | H_LX-80         |

|   |    |          |                 |      |    |           |           |   |   |                 |
|---|----|----------|-----------------|------|----|-----------|-----------|---|---|-----------------|
| 2 | 2  | PDZD2    | NM_178140.2     | 22   | 5  | 31835177  | 31835178  | 0 | C | H_LX-80         |
| 2 | 2  | PDZD2    | NM_178140.2     | 26   | 5  | 31835188  | 31835189  | 0 | A | H_LX-80         |
| 2 | 1  | PXDNL    | NM_144651       | 469  | 8  | 52522236  | 52522236  | G | A | MEL4            |
| 2 | 1  | PXDNL    | NM_144651       | 468  | 8  | 52522240  | 52522240  | G | A | MEL12           |
| 2 | 5  | PXDNL    | NM_144651       | 463  | 8  | 52522255  | 52522255  | C | T | MEL7            |
| 1 | 0  | ABCA13   | NM_152701.2     | 4730 | 7  | 48538486  | 48538486  | G | A | H_LX-WU_MEL_522 |
| 1 | 0  | ABCA13   | NM_152701.2     | 4730 | 7  | 48538485  | 48538485  | G | A | H_LX-WU_MEL_522 |
| 1 | 10 | ABCA13   | NM_152701       | 4594 | 7  | 48530328  | 48530328  | C | T | MEL9            |
| 1 | 10 | ABCA13   | NM_152701       | 4604 | 7  | 48530359  | 48530359  | C | T | MEL11           |
| 1 | 0  | ACSS3    | NM_024560       | 634  | 12 | 80171485  | 80171485  | C | T | MEL3            |
| 1 | 0  | ACSS3    | NM_024560       | 634  | 12 | 80171485  | 80171485  | C | T | MEL4            |
| 1 | 4  | ADAM7    | NM_003817       | 567  | 8  | 24406490  | 24406490  | C | T | MEL6            |
| 1 | 4  | ADAM7    | NM_003817       | 563  | 8  | 24406477  | 24406477  | G | A | MEL11           |
| 1 | 2  | ADAMTS20 | NM_025003       | 985  | 12 | 42112516  | 42112516  | C | T | MEL5            |
| 1 | 2  | ADAMTS20 | NM_025003       | 987  | 12 | 42112510  | 42112510  | C | T | MEL2            |
| 1 | 8  | ADAMTSL3 | NM_207517       | 460  | 15 | 82352557  | 82352557  | G | A | MEL9            |
| 1 | 8  | ADAMTSL3 | NM_207517       | 452  | 15 | 82352532  | 82352532  | G | A | MEL11           |
| 1 | 0  | AHCTF1   | NM_015446.3     | 87   | 1  | 245146182 | 245146182 | G | A | H_LX-159        |
| 1 | 0  | AHCTF1   | NM_015446.3     | 87   | 1  | 245146182 | 245146182 | G | A | H_LX-WU_MEL_21  |
| 1 | 3  | ANK3     | NM_020987       | 919  | 10 | 61564120  | 61564120  | G | A | MEL6            |
| 1 | 9  | ANK3     | NM_020987       | 1632 | 10 | 61505750  | 61505750  | G | A | MEL5            |
| 1 | 3  | ANK3     | NM_020987       | 916  | 10 | 61564129  | 61564129  | G | A | MEL8            |
| 1 | 9  | ANK3     | NM_020987       | 1623 | 10 | 61505777  | 61505777  | C | T | MEL1            |
| 1 | 2  | ANKRD32  | NM_032290       | 82   | 5  | 94049998  | 94049998  | C | 0 | MEL12           |
| 1 | 2  | ANKRD32  | NM_032290       | 80   | 5  | 94049992  | 94049992  | G | A | MEL9            |
| 1 | 1  | ASCL5    | XM_001719321    | 81   | 1  | 199351597 | 199351597 | C | T | MEL10           |
| 1 | 1  | ASCL5    | XM_001719321    | 82   | 1  | 199351595 | 199351595 | G | A | MEL9            |
| 1 | 3  | ASXL3    | NM_030632       | 533  | 18 | 29572964  | 29572964  | T | G | MEL6            |
| 1 | 3  | ASXL3    | NM_030632       | 536  | 18 | 29572974  | 29572974  | G | T | MEL4            |
| 1 | 8  | BARX2    | NM_003658       | 92   | 11 | 128811943 | 128811943 | G | A | MEL9            |
| 1 | 8  | BARX2    | NM_003658       | 84   | 11 | 128811919 | 128811919 | C | T | MEL5            |
| 1 | 10 | BLMH     | NM_000386       | 387  | 17 | 25618085  | 25618085  | C | T | MEL9            |
| 1 | 10 | BLMH     | NM_000386       | 397  | 17 | 25618055  | 25618055  | G | T | MEL10           |
| 1 | 0  | BRAF     | NM_004333       | 574  | 7  | 140100477 | 140100477 | G | A | MEL4            |
| 1 | 0  | BRAF     | NM_004333       | 574  | 7  | 140100476 | 140100476 | T | A | MEL9            |
| 1 | 10 | BTN2A3   | ENST00000244504 | 197  | 6  | 26531649  | 26531649  | C | T | MEL6            |
| 1 | 10 | BTN2A3   | ENST00000244504 | 187  | 6  | 26531621  | 26531621  | G | A | MEL12           |
| 1 | 7  | C4orf18  | NM_001031700    | 154  | 4  | 159311518 | 159311518 | C | T | MEL9            |
| 1 | 7  | C4orf18  | NM_001031700    | 161  | 4  | 159311497 | 159311497 | C | T | MEL6            |
| 1 | 9  | C4orf37  | NM_174952       | 358  | 4  | 98981079  | 98981079  | C | T | MEL9            |
| 1 | 9  | C4orf37  | NM_174952       | 349  | 4  | 98981107  | 98981107  | C | T | MEL8            |
| 1 | 2  | C6orf190 | NM_001010923    | 505  | 6  | 128175966 | 128175966 | G | A | MEL12           |
| 1 | 2  | C6orf190 | NM_001010923    | 503  | 6  | 128175972 | 128175972 | C | T | MEL3            |
| 1 | 7  | C6orf222 | NM_001010903    | 485  | 6  | 36399065  | 36399065  | G | A | MEL11           |
| 1 | 7  | C6orf222 | NM_001010903    | 492  | 6  | 36398195  | 36398195  | G | A | MEL12           |
| 1 | 7  | CA2      | NM_000067       | 145  | 8  | 86573887  | 86573887  | T | 0 | MEL9            |
| 1 | 7  | CA2      | NM_000067       | 138  | 8  | 86573865  | 86573865  | G | A | MEL7            |

|   |    |               |                 |     |    |           |           |   |   |                 |
|---|----|---------------|-----------------|-----|----|-----------|-----------|---|---|-----------------|
| 1 | 0  | CASP8         | NM_001080125    | 107 | 2  | 201839596 | 201839596 | C | T | MEL10           |
| 1 | 0  | CASP8         | NM_001080125    | 107 | 2  | 201839596 | 201839596 | C | T | MEL11           |
| 1 | 8  | CCDC54        | NM_032600       | 277 | 3  | 108579954 | 108579954 | C | T | MEL9            |
| 1 | 8  | CCDC54        | NM_032600       | 285 | 3  | 108579977 | 108579977 | G | A | MEL3            |
| 1 | 0  | CCL7          | ENST00000394627 | 71  | 17 | 29622330  | 29622330  | C | T | MEL6            |
| 1 | 0  | CCL7          | ENST00000394627 | 71  | 17 | 29622330  | 29622330  | C | T | MEL4            |
| 1 | 9  | CDH10         | NM_006727       | 656 | 5  | 24523929  | 24523929  | C | T | MEL9            |
| 1 | 9  | CDH10         | NM_006727       | 665 | 5  | 24523903  | 24523903  | C | T | MEL10           |
| 1 | 10 | CDK2          | NM_001798       | 204 | 12 | 54651116  | 54651116  | C | T | MEL9            |
| 1 | 10 | CDK2          | NM_001798       | 214 | 12 | 54651147  | 54651147  | G | A | MEL9            |
| 1 | 1  | CEP350        | NM_014810       | 125 | 1  | 178227960 | 178227960 | G | A | MEL9            |
| 1 | 1  | CEP350        | NM_014810       | 124 | 1  | 178227957 | 178227957 | C | T | MEL4            |
| 1 | 0  | CER1          | NM_005454       | 30  | 9  | 14712583  | 14712583  | G | A | MEL6            |
| 1 | 0  | CER1          | NM_005454       | 30  | 9  | 14712583  | 14712583  | G | A | MEL13           |
| 1 | 0  | CNKSR3        | NM_173515.2     | 457 | 6  | 154773169 | 154773169 | C | T | H_LX-WU_MEL_21  |
| 1 | 0  | CNKSR3        | NM_173515.2     | 457 | 6  | 154773168 | 154773168 | C | T | H_LX-WU_MEL_21  |
| 1 | 5  | COL2A1        | NM_001844       | 624 | 12 | 46664612  | 46664612  | C | T | MEL9            |
| 1 | 5  | COL2A1        | NM_001844       | 629 | 12 | 46664595  | 46664595  | C | T | MEL9            |
| 1 | 3  | COL9A1        | NM_001851.4     | 520 | 6  | 71021627  | 71021627  | C | T | H_LX-139        |
| 1 | 3  | COL9A1        | NM_001851.4     | 517 | 6  | 71021768  | 71021768  | C | T | H_LX-139        |
| 1 | 6  | CRISP2        | NM_003296       | 193 | 6  | 49771534  | 49771534  | G | A | MEL11           |
| 1 | 6  | CRISP2        | NM_003296       | 199 | 6  | 49771516  | 49771516  | C | T | MEL9            |
| 1 | 0  | CSMD1         | ENST00000335551 | 162 | 8  | 3252876   | 3252876   | G | A | H_LX-WU_MEL_522 |
| 1 | 0  | CSMD1         | ENST00000335551 | 162 | 8  | 3252876   | 3252876   | G | A | MEL10           |
| 1 | 0  | CSMD1         | NM_033225       | 672 | 8  | 3252888   | 3252888   | G | A | MEL6            |
| 1 | 0  | CSMD1         | NM_033225       | 672 | 8  | 3252888   | 3252888   | G | A | MEL3            |
| 1 | 10 | CSMD1         | NM_033225.4     | 838 | 8  | 3241208   | 3241208   | G | A | H_LX-WU_MEL_500 |
| 1 | 10 | CSMD1         | NM_033225.4     | 828 | 8  | 3241237   | 3241237   | C | T | H_LX-80         |
| 1 | 2  | CYFIP2        | ENST00000398252 | 192 | 5  | 156718638 | 156718638 | C | T | MEL6            |
| 1 | 2  | CYFIP2        | ENST00000398252 | 190 | 5  | 156718632 | 156718632 | G | A | MEL8            |
| 1 | 0  | CYP4Z2P       | ENST00000294342 | 47  | 1  | 47138555  | 47138555  | G | A | MEL6            |
| 1 | 0  | CYP4Z2P       | ENST00000294342 | 47  | 1  | 47138555  | 47138555  | G | A | MEL12           |
| 1 | 0  | CYTH4         | NM_013385       | 285 | 22 | 36037019  | 36037019  | G | A | MEL6            |
| 1 | 0  | CYTH4         | NM_013385       | 285 | 22 | 36037019  | 36037019  | G | A | MEL7            |
| 1 | 2  | DBC1          | NM_014618       | 688 | 9  | 120969406 | 120969406 | G | A | MEL3            |
| 1 | 2  | DBC1          | NM_014618       | 690 | 9  | 120969400 | 120969400 | G | A | MEL1            |
| 1 | 8  | DCDC2         | NM_016356       | 377 | 6  | 24286734  | 24286734  | C | T | MEL6            |
| 1 | 8  | DCDC2         | NM_016356       | 369 | 6  | 24286756  | 24286756  | C | T | MEL9            |
| 1 | 2  | DEFA6         | NM_001926       | 84  | 8  | 6769802   | 6769802   | G | A | MEL6            |
| 1 | 2  | DEFA6         | NM_001926       | 86  | 8  | 6769796   | 6769796   | C | T | MEL6            |
| 1 | 6  | DISC1         | NM_018662       | 563 | 1  | 229997663 | 229997663 | A | G | MEL9            |
| 1 | 6  | DISC1         | NM_018662       | 557 | 1  | 229997646 | 229997646 | T | C | MEL9            |
| 1 | 4  | DKFZp779B1634 | XM_292717       | 725 | 18 | 12116035  | 12116035  | G | A | MEL6            |
| 1 | 4  | DKFZp779B1634 | XM_292717       | 729 | 18 | 12116048  | 12116048  | G | A | MEL4            |
| 1 | 0  | DNAH11        | ENST00000328843 | 940 | 7  | 21606081  | 21606081  | C | T | H_LX-WU_MEL_522 |



|   |    |                 |                 |        |           |           |           |     |   |                 |
|---|----|-----------------|-----------------|--------|-----------|-----------|-----------|-----|---|-----------------|
| 1 | 0  | DNAH11          | ENST00000328843 | 940    | 7         | 21606080  | 21606080  | C   | T | H_LX-WU_MEL_522 |
| 1 | 10 | DNAH8           | NM_001371       | 2810   | 6         | 38975546  | 38975546  | G   | A | MEL11           |
| 1 | 10 | DNAH8           | NM_001371       | 2820   | 6         | 38975576  | 38975576  | G   | A | MEL12           |
| 1 | 5  | DNAH9           | NM_001372       | 1741   | 17        | 11548314  | 11548314  | G   | A | MEL5            |
| 1 | 5  | DNAH9           | NM_001372       | 1746   | 17        | 11548331  | 11548331  | G   | A | MEL11           |
| 1 | 6  | DSCAM           | NM_001389       | 224    | 21        | 40647525  | 40647525  | G   | C | MEL11           |
| 1 | 6  | DSCAM           | NM_001389       | 230    | 21        | 40647508  | 40647508  | C   | T | MEL12           |
| 1 | 10 | DSG3            | NM_001944       | 138    | 18        | 27293033  | 27293033  | G   | A | MEL9            |
| 1 | 10 | DSG3            | NM_001944       | 128    | 18        | 27293004  | 27293004  | G   | A | MEL6            |
| 1 | 5  | DSP             | NM_004415       | 1312   | 6         | 7525357   | 7525357   | C   | T | MEL5            |
| 1 | 5  | DSP             | NM_004415       | 1307   | 6         | 7525342   | 7525342   | C   | T | MEL9            |
| 1 | 3  | EGFLAM          | NM_152403       | 157    | 5         | 38388114  | 38388114  | G   | A | MEL5            |
| 1 | 3  | EGFLAM          | NM_152403       | 154    | 5         | 38388106  | 38388106  | C   | T | MEL8            |
| 1 | 0  | ENSG00000205693 | ENST00000381273 | 136    | 12        | 27807537  | 27807537  | A   | 0 | MEL10           |
| 1 | 0  | ENSG00000205693 | ENST00000381273 | 136    | 12        | 27807535  | 27807535  | T   | 0 | MEL10           |
| 1 | 6  | ENSG00000211744 | ENST00000390391 | 8      | 7         | 141990254 | 141990254 | G   | A | MEL9            |
| 1 | 6  | ENSG00000211744 | ENST00000390391 | 14     | 7         | 141990271 | 141990271 | T   | G | MEL5            |
| 1 | 4  | ENSG00000212884 | ENST00000391571 | 1      | NT_113930 | 117370    | 117370    | A   | G | H_LX-WU_MEL_522 |
| 1 | 4  | ENSG00000212884 | ENST00000391571 | 5      | NT_113930 | 117384    | 117384    | C   | A | H_LX-139        |
| 1 | 8  | ENSG00000214481 | ENST00000398401 | 349    | 6         | 78689663  | 78689663  | C   | T | MEL3            |
| 1 | 8  | ENSG00000214481 | ENST00000398401 | 357    | 6         | 78689689  | 78689689  | C   | A | MEL4            |
| 1 | 9  | ENSG00000215231 | ENST00000399853 | 123    | 5         | 5110909   | 5110909   | G   | A | MEL4            |
| 1 | 9  | ENSG00000215231 | ENST00000399853 | 114    | 5         | 5110882   | 5110882   | G   | A | MEL6            |
| 1 | 7  | EPB41L1         | ENST00000344237 | 679    | 20        | 34258725  | 34258725  | C   | T | MEL4            |
| 1 | 7  | EPB41L1         | ENST00000344237 | 672    | 20        | 34258704  | 34258704  | G   | A | MEL9            |
| 1 | 1  | EPHA3           | NM_005233.5     | 317    | 3         | 89472890  | 89472890  | C   | T | H_LX-167        |
| 1 | 1  | EPHA3           | NM_005233.5     | 316    | 3         | 89472887  | 89472887  | G   | A | H_LX-123        |
| 1 | 2  | EPHA7           | NM_004440       | 223    | 6         | 94177105  | 94177105  | C   | T | MEL6            |
| 1 | 2  | EPHA7           | NM_004440       | 225    | 6         | 94177098  | 94177098  | G   | A | MEL5            |
| 1 | 0  | F5              | NM_000130.4     | 1321   | 1         | 167776991 | 167776991 | T   | G | H_LX-139        |
| 1 | 0  | F5              | NM_000130.4     | 1321   | 1         | 167776991 | 167776991 | T   | G | H_LX-123        |
| 1 | 0  | FAM133A         | NM_173698       | 36     | X         | 92851180  | 92851180  | C   | T | MEL6            |
| 1 | 0  | FAM133A         | NM_173698       | 36     | X         | 92851181  | 92851181  | G   | A | MEL7            |
| 1 | 0  | FAM19A3         | NM_001004440    | 152    | 1         | 113068278 | 113068278 | C   | T | MEL4            |
| 1 | 0  | FAM19A3         | NM_001004440    | 152    | 1         | 113068279 | 113068279 | C   | T | MEL4            |
| 1 | 0  | FLG             | NM_002016       | 888    | 1         | 150551323 | 150551323 | C   | T | MEL6            |
| 1 | 0  | FLG             | NM_002016       | 888    | 1         | 150551323 | 150551323 | C   | T | MEL5            |
| 1 | 0  | FMN2            | NM_020066.4     | 197    | 1         | 238322192 | 238322194 | GGC | 0 | H_LX-172        |
| 1 | 0  | FMN2            | NM_020066.4     | 197    | 1         | 238322192 | 238322194 | GGC | 0 | H_LX-139        |
| 1 | 2  | FNBP1           | NM_015033       | 309    | 9         | 131727122 | 131727122 | G   | A | MEL3            |
| 1 | 2  | FNBP1           | NM_015033       | 307    | 9         | 131727128 | 131727128 | C   | T | MEL9            |
| 1 | 4  | FREM3           | XM_094074       | 1025   | 4         | 144838206 | 144838206 | C   | T | MEL6            |
| 1 | 4  | FREM3           | XM_094074       | 1029   | 4         | 144838194 | 144838194 | G   | A | MEL12           |
| 1 | 1  | FRG1            | NM_004477.2     | 145146 | 4         | 191115549 | 191115550 | 0   | A | H_LX-159        |
| 1 | 1  | FRG1            | NM_004477.2     | 144    | 4         | 191113301 | 191113301 | G   | C | H_LX-WU_Mel_218 |
| 1 | 0  | FRG1            | NM_004477.2     | 172173 | 4         | 191115630 | 191115632 | AGG | 0 | H_LX-WU_MEL_522 |

|   |    |          |                 |           |    |           |           |     |   |                 |
|---|----|----------|-----------------|-----------|----|-----------|-----------|-----|---|-----------------|
| 1 | 0  | FRG1     | NM_004477.2     | 172173    | 4  | 191115630 | 191115632 | AGG | 0 | H_LX-WU_MEL_503 |
| 1 | 0  | FRG1B    | ENST00000278882 | 77        | 20 | 28241887  | 28241887  | G   | A | H_LX-80         |
| 1 | 0  | FRG1B    | ENST00000278882 | 77        | 20 | 28241887  | 28241887  | G   | A | H_LX-189        |
| 1 | 5  | GABRA6   | NM_000811       | 79        | 5  | 161048544 | 161048544 | G   | A | MEL6            |
| 1 | 5  | GABRA6   | NM_000811       | 74        | 5  | 161046582 | 161046582 | G   | A | MEL7            |
| 1 | 0  | GARNL1   | NM_194301.1     | 1149,1150 | 14 | 35211931  | 35211932  | 0   | G | H_LX-139        |
| 1 | 0  | GARNL1   | NM_194301.1     | 1150      | 14 | 35211929  | 35211930  | 0   | A | H_LX-139        |
| 1 | 0  | GARNL1   | NM_194301       | 1708      | 14 | 35166264  | 35166264  | G   | A | MEL9            |
| 1 | 0  | GARNL1   | NM_194301       | 1708      | 14 | 35166264  | 35166264  | G   | A | MEL6            |
| 1 | 3  | GIMAP4   | NM_018326       | 57        | 7  | 149900260 | 149900260 | C   | T | MEL4            |
| 1 | 3  | GIMAP4   | NM_018326       | 54        | 7  | 149900251 | 149900251 | A   | T | MEL13           |
| 1 | 8  | GLT25D2  | NM_015101       | 566       | 1  | 182174702 | 182174702 | G   | A | MEL9            |
| 1 | 8  | GLT25D2  | NM_015101       | 574       | 1  | 182174678 | 182174678 | G   | A | MEL9            |
| 1 | 8  | GPR112   | NM_153834       | 203       | X  | 135233139 | 135233139 | G   | A | MEL6            |
| 1 | 8  | GPR112   | NM_153834       | 195       | X  | 135233115 | 135233115 | G   | A | MEL7            |
| 1 | 5  | GRIN2B   | NM_000834       | 167       | 12 | 13798027  | 13798027  | G   | T | MEL9            |
| 1 | 5  | GRIN2B   | NM_000834       | 162       | 12 | 13798044  | 13798044  | C   | T | MEL7            |
| 1 | 0  | GRIN2B   | NM_000834.3     | 888       | 12 | 13608777  | 13608777  | T   | A | H_LX-167        |
| 1 | 0  | GRIN2B   | NM_000834.3     | 888       | 12 | 13608776  | 13608776  | G   | A | H_LX-167        |
| 1 | 0  | GRIN3A   | NM_133445.2     | 179       | 9  | 103539547 | 103539547 | G   | A | H_LX-167        |
| 1 | 0  | GRIN3A   | NM_133445.2     | 179       | 9  | 103539547 | 103539547 | G   | C | H_LX-WU_Mel_218 |
| 1 | 7  | HDAC9    | NM_178425       | 194       | 7  | 18600093  | 18600093  | C   | T | MEL9            |
| 1 | 7  | HDAC9    | NM_178425       | 187       | 7  | 18600073  | 18600073  | C   | T | MEL9            |
| 1 | 9  | HEATR5A  | ENST00000389961 | 236       | 14 | 30933074  | 30933074  | A   | G | MEL11           |
| 1 | 9  | HEATR5A  | ENST00000389961 | 245       | 14 | 30933048  | 30933048  | T   | A | MEL4            |
| 1 | 4  | HHLA2    | NM_007072       | 306       | 3  | 109559611 | 109559611 | G   | A | MEL11           |
| 1 | 4  | HHLA2    | NM_007072       | 302       | 3  | 109559601 | 109559601 | G   | A | MEL9            |
| 1 | 7  | HIPK1    | NM_198268       | 110       | 1  | 114284857 | 114284857 | G   | T | MEL4            |
| 1 | 7  | HIPK1    | NM_198268       | 117       | 1  | 114284877 | 114284877 | C   | T | MEL6            |
| 1 | 4  | HTR2C    | ENST00000371950 | 164       | X  | 114047442 | 114047442 | G   | A | H_LX-159        |
| 1 | 4  | HTR2C    | ENST00000371950 | 160       | X  | 114047430 | 114047430 | G   | A | MEL6            |
| 1 | 0  | IGF2R    | NM_000876.2     | 1766      | 6  | 160417000 | 160417000 | T   | 0 | H_LX-WU_MEL_522 |
| 1 | 0  | IGF2R    | NM_000876.2     | 1766      | 6  | 160416998 | 160416998 | T   | C | H_LX-WU_MEL_522 |
| 1 | 7  | ILDR1    | NM_175924       | 207       | 3  | 123202871 | 123202871 | G   | A | MEL7            |
| 1 | 7  | ILDR1    | NM_175924       | 200       | 3  | 123202893 | 123202893 | A   | G | MEL3            |
| 1 | 6  | KCND2    | NM_012281       | 178       | 7  | 119702454 | 119702454 | C   | T | MEL7            |
| 1 | 6  | KCND2    | NM_012281       | 184       | 7  | 119702472 | 119702472 | G   | A | MEL12           |
| 1 | 4  | KCNJ15   | NM_002243       | 238       | 21 | 38593765  | 38593765  | C   | T | MEL3            |
| 1 | 4  | KCNJ15   | NM_002243       | 242       | 21 | 38593778  | 38593778  | C   | T | MEL4            |
| 1 | 10 | KIAA0564 | NM_015058       | 1538      | 13 | 41087221  | 41087221  | C   | T | MEL9            |
| 1 | 10 | KIAA0564 | NM_015058       | 1548      | 13 | 41087190  | 41087190  | C   | T | MEL5            |
| 1 | 3  | KIAA1109 | NM_015312       | 4362      | 4  | 123488340 | 123488340 | C   | T | MEL5            |
| 1 | 3  | KIAA1109 | NM_015312       | 4359      | 4  | 123488331 | 123488331 | C   | T | MEL6            |
| 1 | 7  | LBR      | NM_002296       | 97        | 1  | 223676478 | 223676478 | G   | A | MEL9            |
| 1 | 7  | LBR      | NM_002296       | 104       | 1  | 223676457 | 223676457 | G   | A | MEL6            |
| 1 | 0  | LCT      | NM_002299.2     | 1081      | 2  | 136283145 | 136283145 | G   | A | H_LX-WU_MEL_21  |

|   |   |              |                 |      |    |           |           |   |   |                 |
|---|---|--------------|-----------------|------|----|-----------|-----------|---|---|-----------------|
| 1 | 0 | LCT          | NM_002299.2     | 1081 | 2  | 136283146 | 136283146 | G | A | H_LX-WU_MEL_21  |
| 1 | 0 | LILRA5       | NM_181879       | 264  | 19 | 59514417  | 59514417  | G | A | MEL9            |
| 1 | 0 | LILRA5       | NM_181879       | 264  | 19 | 59514417  | 59514417  | G | A | MEL11           |
| 1 | 4 | LOC100129126 | XM_001715328    | 170  | 7  | 63061752  | 63061752  | G | A | MEL5            |
| 1 | 4 | LOC100129126 | XM_001715328    | 174  | 7  | 63061741  | 63061741  | G | A | MEL9            |
| 1 | 4 | LOC100129870 | XM_001715927    | 167  | 5  | 79400173  | 79400173  | C | T | MEL9            |
| 1 | 4 | LOC100129870 | XM_001715927    | 171  | 5  | 79400162  | 79400162  | G | A | MEL9            |
| 1 | 7 | LOC100131190 | XM_001722162    | 124  | 21 | 41657798  | 41657798  | C | T | MEL9            |
| 1 | 7 | LOC100131190 | XM_001722162    | 117  | 21 | 41657777  | 41657777  | G | A | MEL9            |
| 1 | 6 | LOC100131397 | XM_001716553    | 122  | 5  | 16233496  | 16233496  | C | T | MEL11           |
| 1 | 6 | LOC100131397 | XM_001716553    | 128  | 5  | 16233514  | 16233514  | G | A | MEL4            |
| 1 | 2 | LOC100134205 | XM_001716692    | 183  | 6  | 4396100   | 4396100   | G | A | MEL7            |
| 1 | 2 | LOC100134205 | XM_001716692    | 185  | 6  | 4396095   | 4396095   | G | A | MEL9            |
| 1 | 9 | LOC100134607 | XM_001719062    | 70   | 7  | 55205928  | 55205928  | G | A | MEL13           |
| 1 | 9 | LOC100134607 | XM_001719062    | 79   | 7  | 55205900  | 55205900  | C | T | MEL5            |
| 1 | 8 | LOC339760    | XM_295058       | 381  | 2  | 127373586 | 127373586 | G | A | MEL5            |
| 1 | 8 | LOC339760    | XM_295058       | 373  | 2  | 127373332 | 127373332 | G | A | MEL7            |
| 1 | 1 | LOC728667    | XM_001128080    | 29   | 14 | 23367151  | 23367151  | A | G | MEL12           |
| 1 | 1 | LOC728667    | XM_001128080    | 28   | 14 | 23367153  | 23367153  | C | T | MEL4            |
| 1 | 5 | LOC728944    | XM_001128859    | 234  | 2  | 50667     | 50667     | C | T | MEL6            |
| 1 | 5 | LOC728944    | XM_001128859    | 239  | 2  | 50652     | 50652     | C | T | MEL5            |
| 1 | 3 | LOC728946    | XM_001128870    | 2    | 17 | 87345     | 87345     | C | T | MEL9            |
| 1 | 3 | LOC728946    | XM_001128870    | 5    | 17 | 87355     | 87355     | G | A | MEL4            |
| 1 | 0 | LOC729025    | XM_001129090    | 476  | 12 | 16261150  | 16261150  | C | T | MEL11           |
| 1 | 0 | LOC729025    | XM_001129090    | 476  | 12 | 16261150  | 16261150  | C | T | MEL8            |
| 1 | 4 | LOC731932    | XM_001716667    | 18   | 13 | 45933148  | 45933148  | C | T | MEL6            |
| 1 | 4 | LOC731932    | XM_001716667    | 22   | 13 | 45933135  | 45933135  | G | A | MEL9            |
| 1 | 7 | MACROD2      | NM_080676       | 418  | 20 | 15978497  | 15978497  | G | C | MEL5            |
| 1 | 7 | MACROD2      | NM_080676       | 411  | 20 | 15978474  | 15978474  | G | A | MEL5            |
| 1 | 4 | MAPK10       | NM_138982       | 414  | 4  | 87169385  | 87169385  | G | A | MEL9            |
| 1 | 4 | MAPK10       | NM_138982       | 418  | 4  | 87157548  | 87157548  | C | T | MEL4            |
| 1 | 0 | MBD5         | NM_018328.3     | 1350 | 2  | 148964418 | 148964418 | C | T | H_LX-WU_MEL_521 |
| 1 | 0 | MBD5         | NM_018328.3     | 1350 | 2  | 148964419 | 148964419 | C | T | H_LX-WU_MEL_521 |
| 1 | 0 | MLL2         | NM_003482.3     | 4945 | 12 | 47707182  | 47707182  | G | A | H_LX-WU_MEL_522 |
| 1 | 0 | MLL2         | NM_003482.3     | 4945 | 12 | 47707183  | 47707183  | G | C | H_LX-WU_MEL_522 |
| 1 | 4 | MMACHC       | NM_015506       | 117  | 1  | 45746543  | 45746543  | G | A | MEL9            |
| 1 | 4 | MMACHC       | NM_015506       | 113  | 1  | 45746532  | 45746532  | C | T | MEL6            |
| 1 | 9 | MUC4         | ENST00000405167 | 3838 | 3  | 196991334 | 196991334 | C | T | H_LX-167        |
| 1 | 5 | MUC4         | ENST00000405167 | 3616 | 3  | 196992000 | 196992000 | G | A | H_LX-167        |
| 1 | 9 | MUC4         | ENST00000405167 | 3174 | 3  | 196993324 | 196993325 | 0 | G | H_LX-167        |
| 1 | 5 | MUC4         | ENST00000405167 | 3621 | 3  | 196991984 | 196991984 | C | T | H_LX-167        |
| 1 | 9 | MUC4         | ENST00000405167 | 3829 | 3  | 196991360 | 196991360 | T | C | H_LX-167        |
| 1 | 9 | MUC4         | ENST00000405167 | 3165 | 3  | 196993353 | 196993353 | C | G | H_LX-WU_MEL_21  |
| 1 | 9 | MUSK         | NM_005592       | 520  | 9  | 112587089 | 112587089 | A | T | MEL6            |
| 1 | 9 | MUSK         | NM_005592       | 529  | 9  | 112587627 | 112587627 | G | A | MEL9            |

|   |    |         |                 |      |    |           |           |   |   |                 |
|---|----|---------|-----------------|------|----|-----------|-----------|---|---|-----------------|
| 1 | 7  | MYO7A   | NM_000260       | 2039 | 11 | 76600024  | 76600024  | G | A | MEL6            |
| 1 | 7  | MYO7A   | NM_000260       | 2032 | 11 | 76600001  | 76600001  | C | T | MEL4            |
| 1 | 1  | NCF2    | NM_000433       | 187  | 1  | 181808993 | 181808993 | C | T | MEL3            |
| 1 | 1  | NCF2    | NM_000433       | 188  | 1  | 181808989 | 181808989 | C | T | MEL9            |
| 1 | 4  | NIPBL   | NM_133433       | 1670 | 5  | 37055260  | 37055260  | G | A | MEL9            |
| 1 | 4  | NIPBL   | NM_133433       | 1674 | 5  | 37056327  | 37056327  | A | G | MEL8            |
| 1 | 9  | NPY1R   | NM_000909       | 138  | 4  | 164466744 | 164466744 | C | T | MEL9            |
| 1 | 9  | NPY1R   | NM_000909       | 147  | 4  | 164466717 | 164466717 | C | G | MEL6            |
| 1 | 3  | NRK     | ENST00000243300 | 1325 | X  | 105074600 | 105074600 | G | A | H_LX-80         |
| 1 | 3  | NRK     | ENST00000243300 | 1322 | X  | 105074592 | 105074592 | A | C | MEL5            |
| 1 | 2  | NUAK1   | NM_014840       | 544  | 12 | 104985066 | 104985066 | C | T | MEL7            |
| 1 | 2  | NUAK1   | NM_014840       | 546  | 12 | 104985059 | 104985059 | G | A | MEL5            |
| 1 | 0  | ODZ3    | NM_001080477    | 858  | 4  | 183887315 | 183887315 | C | T | MEL9            |
| 1 | 0  | ODZ3    | NM_001080477    | 858  | 4  | 183887315 | 183887315 | C | T | MEL8            |
| 1 | 8  | OR1S1   | NM_001004458    | 85   | 11 | 57739046  | 57739046  | C | T | MEL6            |
| 1 | 8  | OR1S1   | NM_001004458    | 93   | 11 | 57739070  | 57739070  | A | T | MEL4            |
| 1 | 0  | OR2A5   | NM_012365       | 21   | 7  | 143378489 | 143378489 | G | A | MEL6            |
| 1 | 0  | OR2A5   | NM_012365       | 21   | 7  | 143378489 | 143378489 | G | A | MEL3            |
| 1 | 0  | OR2AP1  | ENST00000321688 | 171  | 12 | 54254977  | 54254977  | G | A | MEL4            |
| 1 | 0  | OR2AP1  | ENST00000321688 | 171  | 12 | 54254977  | 54254977  | G | A | MEL11           |
| 1 | 0  | OR2T4   | NM_001004696.1  | 253  | 1  | 246592262 | 246592262 | A | 0 | H_LX-167        |
| 1 | 0  | OR2T4   | NM_001004696.1  | 253  | 1  | 246592262 | 246592262 | A | 0 | H_LX-174        |
| 1 | 1  | OR4A13P | ENST00000314689 | 23   | 11 | 54991174  | 54991174  | T | 0 | H_LX-187        |
| 1 | 1  | OR4A13P | ENST00000314689 | 24   | 11 | 54991177  | 54991177  | G | A | MEL9            |
| 1 | 4  | OR4P4   | NM_001004124    | 273  | 11 | 55163226  | 55163226  | T | A | MEL6            |
| 1 | 4  | OR4P4   | NM_001004124    | 277  | 11 | 55163239  | 55163239  | C | T | MEL2            |
| 1 | 1  | OR52B4  | NM_001005161    | 244  | 11 | 4345371   | 4345371   | C | T | MEL9            |
| 1 | 1  | OR52B4  | NM_001005161    | 245  | 11 | 4345368   | 4345368   | G | A | MEL3            |
| 1 | 2  | PAPPA2  | NM_020318.2     | 1242 | 1  | 174947666 | 174947666 | G | A | H_LX-WU_Mel_218 |
| 1 | 2  | PAPPA2  | NM_020318.2     | 1244 | 1  | 174947672 | 174947672 | G | A | H_LX-80         |
| 1 | 4  | PCDH15  | ENST00000395445 | 1733 | 10 | 55238617  | 55238617  | T | A | MEL10           |
| 1 | 4  | PCDH15  | ENST00000395445 | 1737 | 10 | 55238607  | 55238607  | C | T | MEL9            |
| 1 | 6  | PCDH15  | NM_033056       | 843  | 10 | 55450181  | 55450181  | G | A | MEL9            |
| 1 | 6  | PCDH15  | NM_033056       | 849  | 10 | 55450164  | 55450164  | C | T | MEL4            |
| 1 | 5  | PCLO    | NM_033026       | 1302 | 7  | 82433135  | 82433135  | G | A | MEL9            |
| 1 | 5  | PCLO    | NM_033026       | 1307 | 7  | 82433121  | 82433121  | G | A | MEL9            |
| 1 | 4  | PCSK5   | ENST00000376754 | 1040 | 9  | 78126282  | 78126282  | G | A | MEL6            |
| 1 | 4  | PCSK5   | ENST00000376754 | 1044 | 9  | 78126294  | 78126294  | G | A | MEL5            |
| 1 | 10 | PENK    | NM_006211       | 219  | 8  | 57516534  | 57516534  | G | A | MEL9            |
| 1 | 10 | PENK    | NM_006211       | 209  | 8  | 57516563  | 57516563  | C | T | MEL2            |
| 1 | 5  | PIWIL1  | NM_004764       | 75   | 12 | 129396284 | 129396284 | C | T | MEL6            |
| 1 | 5  | PIWIL1  | NM_004764       | 70   | 12 | 129396269 | 129396269 | G | A | MEL9            |
| 1 | 2  | PKHD1   | NM_138694       | 3776 | 6  | 51620859  | 51620859  | G | A | MEL1            |
| 1 | 2  | PKHD1   | NM_138694       | 3778 | 6  | 51620853  | 51620853  | C | T | MEL9            |
| 1 | 3  | PLCZ1   | NM_033123       | 476  | 12 | 18739144  | 18739144  | T | C | MEL5            |
| 1 | 3  | PLCZ1   | NM_033123       | 479  | 12 | 18739137  | 18739137  | C | T | MEL11           |
| 1 | 1  | POTEA   | NM_001005365    | 311  | 8  | 43290217  | 43290217  | G | C | MEL11           |
| 1 | 1  | POTEA   | NM_001005365    | 310  | 8  | 43290214  | 43290214  | G | A | MEL6            |
| 1 | 3  | PPP1R3A | NM_002711       | 486  | 7  | 113306926 | 113306926 | C | T | MEL11           |

|   |    |          |                 |      |    |           |           |   |   |                     |
|---|----|----------|-----------------|------|----|-----------|-----------|---|---|---------------------|
| 1 | 3  | PPP1R3A  | NM_002711       | 483  | 7  | 113306935 | 113306935 | C | T | MEL7                |
| 1 | 8  | PREX2    | ENST00000396539 | 898  | 8  | 69178426  | 69178426  | C | T | H_LX-80             |
| 1 | 8  | PREX2    | ENST00000396539 | 890  | 8  | 69178396  | 69178396  | C | T | H_LX-WU_<br>MEL_522 |
| 1 | 8  | PTHLH    | NM_198965       | 94   | 12 | 28007791  | 28007791  | C | T | MEL4                |
| 1 | 8  | PTHLH    | NM_198965       | 102  | 12 | 28007767  | 28007767  | C | T | MEL6                |
| 1 | 1  | PTPRR    | NM_002849.2     | 478  | 12 | 69364239  | 69364239  | G | A | H_LX-WU_<br>Mel_218 |
| 1 | 1  | PTPRR    | NM_002849.2     | 477  | 12 | 69364240  | 69364240  | C | G | H_LX-WU_<br>Mel_218 |
| 1 | 4  | PTPRR    | NM_002849       | 334  | 12 | 69425872  | 69425872  | G | A | MEL6                |
| 1 | 4  | PTPRR    | NM_002849       | 338  | 12 | 69381366  | 69381366  | C | T | MEL9                |
| 1 | 9  | RASA1    | NM_002890       | 481  | 5  | 86694232  | 86694232  | C | T | MEL9                |
| 1 | 9  | RASA1    | NM_002890       | 472  | 5  | 86694205  | 86694205  | T | C | MEL2                |
| 1 | 2  | RNF180   | ENST00000389100 | 463  | 5  | 63656928  | 63656928  | G | A | MEL11               |
| 1 | 2  | RNF180   | ENST00000389100 | 465  | 5  | 63656934  | 63656934  | C | T | MEL4                |
| 1 | 6  | ROBO3    | NM_022370       | 329  | 11 | 124245786 | 124245786 | G | A | MEL13               |
| 1 | 5  | ROBO3    | NM_022370       | 380  | 11 | 124246226 | 124246226 | G | A | MEL9                |
| 1 | 6  | ROBO3    | NM_022370       | 335  | 11 | 124245805 | 124245805 | C | T | MEL9                |
| 1 | 5  | ROBO3    | NM_022370       | 375  | 11 | 124246210 | 124246210 | C | T | MEL5                |
| 1 | 2  | SAGE1    | NM_018666       | 197  | X  | 134815983 | 134815983 | G | A | MEL6                |
| 1 | 2  | SAGE1    | NM_018666       | 195  | X  | 134815978 | 134815978 | C | T | MEL8                |
| 1 | 7  | SALL1    | NM_002968       | 76   | 16 | 49733408  | 49733408  | C | T | MEL11               |
| 1 | 4  | SALL1    | NM_002968       | 391  | 16 | 49732463  | 49732463  | G | A | MEL9                |
| 1 | 7  | SALL1    | NM_002968       | 83   | 16 | 49733387  | 49733387  | C | T | MEL1                |
| 1 | 4  | SALL1    | NM_002968       | 387  | 16 | 49732474  | 49732474  | G | A | MEL9                |
| 1 | 0  | SCN8A    | NM_014191       | 1638 | 12 | 50486449  | 50486449  | C | T | MEL6                |
| 1 | 0  | SCN8A    | NM_014191       | 1638 | 12 | 50486449  | 50486449  | C | T | MEL11               |
| 1 | 3  | SELPLG   | NM_003006       | 107  | 12 | 107541893 | 107541893 | G | A | MEL9                |
| 1 | 3  | SELPLG   | NM_003006       | 110  | 12 | 107541884 | 107541884 | C | T | MEL6                |
| 1 | 10 | SERPINB3 | NM_006919       | 250  | 18 | 59475065  | 59475065  | C | T | MEL3                |
| 1 | 10 | SERPINB3 | NM_006919       | 260  | 18 | 59474264  | 59474264  | T | A | MEL10               |
| 1 | 4  | SHC3     | NM_016848       | 460  | 9  | 90843006  | 90843006  | G | A | MEL9                |
| 1 | 4  | SHC3     | NM_016848       | 464  | 9  | 90842994  | 90842994  | G | A | MEL6                |
| 1 | 3  | SLAMF6   | NM_052931       | 70   | 1  | 158732648 | 158732648 | G | A | MEL12               |
| 1 | 3  | SLAMF6   | NM_052931       | 67   | 1  | 158732657 | 158732657 | G | A | MEL9                |
| 1 | 0  | SLC2A2   | NM_000340       | 84   | 3  | 172215073 | 172215073 | C | T | MEL12               |
| 1 | 0  | SLC2A2   | NM_000340       | 84   | 3  | 172215073 | 172215073 | C | T | MEL6                |
| 1 | 10 | SLC44A3  | NM_152369       | 178  | 1  | 95078098  | 95078098  | C | T | MEL4                |
| 1 | 10 | SLC44A3  | NM_152369       | 168  | 1  | 95075991  | 95075991  | C | T | MEL8                |
| 1 | 2  | SLC5A12  | NM_178498       | 492  | 11 | 26659177  | 26659177  | C | T | MEL9                |
| 1 | 2  | SLC5A12  | NM_178498       | 494  | 11 | 26656933  | 26656933  | C | T | MEL4                |
| 1 | 8  | SLC9A4   | NM_001011552    | 662  | 2  | 102509184 | 102509184 | C | T | MEL12               |
| 1 | 8  | SLC9A4   | NM_001011552    | 670  | 2  | 102509208 | 102509208 | G | A | MEL5                |
| 1 | 9  | SLCO6A1  | NM_173488       | 37   | 5  | 101862338 | 101862338 | C | T | MEL6                |
| 1 | 9  | SLCO6A1  | NM_173488       | 46   | 5  | 101862311 | 101862311 | T | C | MEL11               |
| 1 | 4  | SPTB     | NM_001024858    | 1367 | 14 | 64318928  | 64318928  | T | G | MEL3                |
| 1 | 4  | SPTB     | NM_001024858    | 1363 | 14 | 64318940  | 64318940  | C | T | MEL13               |
| 1 | 0  | STAB2    | NM_017564       | 2340 | 12 | 102676108 | 102676108 | C | T | MEL6                |
| 1 | 0  | STAB2    | NM_017564       | 2340 | 12 | 102676108 | 102676108 | C | T | MEL5                |

|   |    |            |                 |      |    |           |           |   |   |          |
|---|----|------------|-----------------|------|----|-----------|-----------|---|---|----------|
| 1 | 0  | STAC       | NM_003149       | 186  | 3  | 36501539  | 36501539  | G | A | MEL6     |
| 1 | 0  | STAC       | NM_003149       | 186  | 3  | 36501539  | 36501539  | G | A | MEL3     |
| 1 | 4  | SULT1B1    | NM_014465       | 35   | 4  | 70655422  | 70655422  | G | A | MEL9     |
| 1 | 4  | SULT1B1    | NM_014465       | 39   | 4  | 70655409  | 70655409  | T | C | MEL2     |
| 1 | 0  | TBX15      | ENST00000393149 | 248  | 1  | 119229121 | 119229121 | G | A | MEL1     |
| 1 | 0  | TBX15      | ENST00000393149 | 248  | 1  | 119229121 | 119229121 | G | A | MEL11    |
| 1 | 6  | TGFBI      | NM_000358       | 507  | 5  | 135419376 | 135419376 | G | A | MEL6     |
| 1 | 6  | TGFBI      | NM_000358       | 501  | 5  | 135419358 | 135419358 | C | T | MEL6     |
| 1 | 10 | TGM3       | NM_003245       | 305  | 20 | 2246062   | 2246062   | G | A | MEL1     |
| 1 | 10 | TGM3       | NM_003245       | 315  | 20 | 2246091   | 2246091   | C | A | MEL3     |
| 1 | 3  | THSD7B     | NM_001080427    | 126  | 2  | 137530789 | 137530789 | G | A | MEL7     |
| 1 | 3  | THSD7B     | NM_001080427    | 129  | 2  | 137530798 | 137530798 | G | A | MEL5     |
| 1 | 1  | TMPRSS11B  | NM_182502       | 375  | 4  | 68776351  | 68776351  | G | A | MEL9     |
| 1 | 1  | TMPRSS11B  | NM_182502       | 374  | 4  | 68776355  | 68776355  | C | T | MEL7     |
| 1 | 1  | TMPRSS7    | NM_001042575    | 379  | 3  | 113277023 | 113277023 | G | A | MEL4     |
| 1 | 1  | TMPRSS7    | NM_001042575    | 378  | 3  | 113277019 | 113277019 | C | T | MEL12    |
| 1 | 0  | TNRC6B     | NM_015088.1     | 169  | 22 | 38990686  | 38990686  | G | A | H_LX-167 |
| 1 | 0  | TNRC6B     | NM_015088.1     | 169  | 22 | 38990687  | 38990687  | G | A | H_LX-167 |
| 1 | 2  | TRHDE      | NM_013381       | 761  | 12 | 71299032  | 71299032  | C | T | MEL11    |
| 1 | 2  | TRHDE      | NM_013381       | 763  | 12 | 71299039  | 71299039  | C | T | MEL6     |
| 1 | 0  | TRIM46     | NM_025058       | 703  | 1  | 153423118 | 153423118 | C | T | MEL7     |
| 1 | 0  | TRIM46     | NM_025058       | 703  | 1  | 153423118 | 153423118 | C | T | MEL13    |
| 1 | 4  | TRPC6      | NM_004621       | 421  | 11 | 100864910 | 100864910 | C | T | MEL9     |
| 1 | 4  | TRPC6      | NM_004621       | 425  | 11 | 100864897 | 100864897 | C | T | MEL6     |
| 1 | 6  | uc003vxc.2 | ENST00000304182 | 144  | 7  | 141601358 | 141601358 | C | T | MEL4     |
| 1 | 6  | uc003vxc.2 | ENST00000304182 | 150  | 7  | 141598898 | 141598898 | C | T | MEL6     |
| 1 | 9  | uc003vyi.2 | ENST00000390365 | 17   | 7  | 141776303 | 141776303 | G | A | MEL9     |
| 1 | 9  | uc003vyi.2 | ENST00000390365 | 26   | 7  | 141776331 | 141776331 | C | T | MEL9     |
| 1 | 4  | uc003vza.1 | ENST00000390381 | 82   | 7  | 141909061 | 141909061 | G | A | MEL6     |
| 1 | 4  | uc003vza.1 | ENST00000390381 | 86   | 7  | 141909073 | 141909073 | G | A | MEL4     |
| 1 | 3  | UNC13C     | NM_001080534    | 1326 | 15 | 52373544  | 52373544  | G | A | MEL8     |
| 1 | 3  | UNC13C     | NM_001080534    | 1323 | 15 | 52373535  | 52373535  | G | A | MEL5     |
| 1 | 9  | ZFHX4      | NM_024721       | 1072 | 8  | 77853198  | 77853198  | T | A | MEL6     |
| 1 | 9  | ZFHX4      | NM_024721       | 1063 | 8  | 77853171  | 77853171  | C | T | MEL11    |
| 1 | 5  | ZNF208     | NM_007153       | 57   | 19 | 21961915  | 21961915  | C | T | MEL6     |
| 1 | 5  | ZNF208     | NM_007153       | 62   | 19 | 21961899  | 21961899  | G | A | MEL9     |
| 1 | 5  | ZNF230     | NM_006300       | 279  | 19 | 49206866  | 49206866  | C | T | MEL4     |
| 1 | 5  | ZNF230     | NM_006300       | 274  | 19 | 49206851  | 49206851  | C | T | MEL9     |
| 1 | 4  | ZNF343     | NM_024325       | 555  | 20 | 2411944   | 2411944   | C | T | MEL6     |
| 1 | 4  | ZNF343     | NM_024325       | 559  | 20 | 2411931   | 2411931   | C | T | MEL9     |
| 1 | 3  | ZNF713     | NM_182633       | 272  | 7  | 55974715  | 55974715  | C | T | MEL5     |
| 1 | 3  | ZNF713     | NM_182633       | 269  | 7  | 55974706  | 55974706  | G | A | MEL6     |
| 1 | 9  | ZNF725     | ENST00000334589 | 101  | 19 | 23466925  | 23466925  | G | A | MEL9     |
| 1 | 9  | ZNF725     | ENST00000334589 | 92   | 19 | 23479819  | 23479819  | C | T | MEL11    |
| 1 | 0  | ZNF831     | NM_178457       | 1393 | 20 | 57261578  | 57261578  | G | A | MEL6     |
| 1 | 0  | ZNF831     | NM_178457       | 1393 | 20 | 57261578  | 57261578  | G | A | MEL7     |

“Mutations within proximity” shows the number of mutations on the same transcript within 10 amino acids and the “nearest mutations” show the number of amino acid between the closest mutations. By our definition, if more than 1 mutation occurs in the same amino acid, the distance to the closest mutation would be “0” amino acids.

**Supplementary Table S2: Characteristics of metastatic melanoma samples analyzed in Figure 3**

**A**

| Variables                  | ALL ( <i>n</i> = 253)                   |      |                                          |      |
|----------------------------|-----------------------------------------|------|------------------------------------------|------|
|                            | RAS <sub>A1</sub> Low ( <i>n</i> = 126) |      | RAS <sub>A1</sub> High ( <i>n</i> = 127) |      |
|                            | Frequency                               | %    | Frequency                                | %    |
| <b>Age</b>                 |                                         |      |                                          |      |
| [18, 40]                   | 18                                      | 14.3 | 23                                       | 18.1 |
| (40, 60]                   | 49                                      | 38.9 | 57                                       | 44.9 |
| (60, 100]                  | 59                                      | 46.8 | 47                                       | 37.0 |
| <b>Gender</b>              |                                         |      |                                          |      |
| Female                     | 53                                      | 42.1 | 43                                       | 33.9 |
| Male                       | 73                                      | 57.9 | 84                                       | 66.1 |
| <b>Tumor Type</b>          |                                         |      |                                          |      |
| Cutaneous                  | 122                                     | 96.8 | 124                                      | 97.6 |
| Mucosal                    | 2                                       | 1.6  | 2                                        | 1.6  |
| Ocular                     | 2                                       | 1.6  | 1                                        | 0.8  |
| <b>Metastasis location</b> |                                         |      |                                          |      |
| Brain                      | 15                                      | 11.9 | 16                                       | 12.6 |
| Lung                       | 10                                      | 7.9  | 14                                       | 11.0 |
| Lymph nodes                | 54                                      | 42.9 | 54                                       | 42.5 |
| Skin/soft tissue           | 30                                      | 23.8 | 29                                       | 22.8 |
| Others                     | 17                                      | 13.5 | 14                                       | 11.0 |

**B**

| Variables         | BRAF wild-type ( <i>n</i> = 61)        |       |                                         |      | BRAF mutant ( <i>n</i> = 42)           |       |                                         |       |
|-------------------|----------------------------------------|-------|-----------------------------------------|------|----------------------------------------|-------|-----------------------------------------|-------|
|                   | RAS <sub>A1</sub> Low ( <i>n</i> = 30) |       | RAS <sub>A1</sub> High ( <i>n</i> = 31) |      | RAS <sub>A1</sub> Low ( <i>n</i> = 21) |       | RAS <sub>A1</sub> High ( <i>n</i> = 21) |       |
|                   | Frequency                              | %     | Frequency                               | %    | Frequency                              | %     | Frequency                               | %     |
| <b>Age</b>        |                                        |       |                                         |      |                                        |       |                                         |       |
| [18, 40]          | 5                                      | 16.7  | 5                                       | 16.1 | 2                                      | 9.5   | 4                                       | 19.   |
| (40, 60]          | 13                                     | 43.3  | 14                                      | 45.2 | 11                                     | 52.4  | 14                                      | 66.7  |
| (60, 100]         | 12                                     | 40.0  | 12                                      | 38.7 | 8                                      | 38.1  | 3                                       | 14.3  |
| <b>Gender</b>     |                                        |       |                                         |      |                                        |       |                                         |       |
| Female            | 14                                     | 46.7  | 8                                       | 25.8 | 7                                      | 33.3  | 10                                      | 47.6  |
| Male              | 16                                     | 53.3  | 23                                      | 74.2 | 14                                     | 66.7  | 11                                      | 52.4  |
| <b>Tumor Type</b> |                                        |       |                                         |      |                                        |       |                                         |       |
| Cutaneous         | 30                                     | 100.0 | 30                                      | 96.8 | 21                                     | 100.0 | 21                                      | 100.0 |
| Mucosal           | 0                                      | 0.0   | 1                                       | 3.2  | 0                                      | 0.0   | 0                                       | 0.0   |
| Ocular            | 0                                      | 0.0   | 0                                       | 0.0  | 0                                      | 0.0   | 0                                       | 0.0   |

| <b>Metastasis location</b> |   |      |    |      |    |      |   |      |
|----------------------------|---|------|----|------|----|------|---|------|
| Brain                      | 4 | 13.3 | 2  | 6.5  | 3  | 14.3 | 1 | 4.8  |
| Lung                       | 5 | 16.7 | 4  | 12.9 | 0  | 0.0  | 4 | 19.0 |
| Lymph nodes                | 6 | 20.0 | 12 | 38.7 | 11 | 52.4 | 8 | 38.1 |
| Skin/soft tissue           | 7 | 23.3 | 7  | 22.6 | 6  | 28.6 | 5 | 23.8 |
| Others                     | 8 | 26.7 | 6  | 19.4 | 1  | 4.8  | 3 | 14.3 |

Age of diagnosis for primary melanoma, gender, location of metastasis, and histological types are shown for each groups of samples.
